# Supplementary material for: Hepatic conversion of acetyl-CoA to acetate plays crucial roles in energy stress
Source: eLife journal article supplement (doi:10.7554/elife.87419), 2023-06-20
Supplement: fig3-figsupp1-data1 [file 20210517.xlsx]

## Sheet: Sheet1
	actin	6314.83	6528.19	7023.42	5278.21	4647.03	4394.39	5123.57	4752.24	4899.59	6499.43	6341.32	6984.97
	ACOT12	738.459	918.32	380.368	401.147	3333.03	2457.12	2911.42	3437.05	3452.89	1955.89	1955.8	3233.96
	0.0969419	0.11694	0.14067	0.054157	0.0760005	0.717238	0.559149	0.56824	0.723249	0.704731	0.300933	0.308421	0.462988
		1.20629	1.45107	0.558655	0.78398	7.39864	5.76788	5.86165	7.46064	7.26962	3.10426	3.1815	4.77593
		1				6.6222				4.58283
		0.403102				0.933476				1.94987
						3.25421e-05				0.0113824
	ACOT8	8034.68	7160.87	6343.53	6251.18	7308.02	9273.63	9436.96	9415.65	10397.1	11599.2	10725.3	10375.7
	1.1142	1.27235	1.09691	0.903197	1.18434	1.57262	2.11033	1.84187	1.98131	2.12203	1.78465	1.69134	1.48544
		1.14194	0.984486	0.810624	1.06295	1.41144	1.89403	1.65309	1.77824	1.90453	1.60174	1.51799	1.33319
		1				1.6842				1.58936
		0.141673				0.206754				0.238192
						0.00157302				0.00536143

## Sheet: Sheet2
	actin	6314.83	6528.19	7023.42	5278.21	4647.03	4394.39	5123.57	4752.24	4899.59	6499.43	6341.32	6984.97
	12	738.459	918.32	380.368	401.147	3333.03	2457.12	2911.42	3437.05	3452.89	1955.89	1955.8	3233.96
	0.0969419	0.11694	0.14067	0.054157	0.0760005	0.717238	0.559149	0.56824	0.723249	0.704731	0.300933	0.308421	0.462988
		1.20629	1.45107	0.558655	0.78398	7.39864	5.76788	5.86165	7.46064	7.26962	3.10426	3.1815	4.77593
		1				6.6222				4.58283
		0.403102				0.933476				1.94987
						3.25421e-05				0.0113824
	8	8034.68	7160.87	6343.53	6251.18	7308.02	9273.63	9436.96	9415.65	10397.1	11599.2	10725.3	10375.7
	1.1142	1.27235	1.09691	0.903197	1.18434	1.57262	2.11033	1.84187	1.98131	2.12203	1.78465	1.69134	1.48544
		1.14194	0.984486	0.810624	1.06295	1.41144	1.89403	1.65309	1.77824	1.90453	1.60174	1.51799	1.33319
		1				1.6842				1.58936
		0.141673				0.206754				0.238192
						0.00157302				0.00536143
