# Supplementary material for: Hepatic conversion of acetyl-CoA to acetate plays crucial roles in energy stress
Source: eLife journal article supplement (doi:10.7554/elife.87419), 2023-06-20
Supplement: fig3-figsupp1-data1 [file Figure 3-figure supplement 1-source data 1.docx]

**Figure 3—figure supplement 1—source data 1**

Complete, unedited immunoblots, as well as immunoblots including sample and band identification, are provided for the immunoblots presented in Figure 3—figure supplement 1.
