# Supplementary material for: Hepatic conversion of acetyl-CoA to acetate plays crucial roles in energy stress
Source: eLife journal article supplement (doi:10.7554/elife.87419), 2023-06-20
Supplement: fig4-data1 [file 20210414cal-o.xlsx]

## Sheet: Sheet2
		6380	6986	5366	6546	5616	2945	3517	2088	2445	2580
	ACOT8	6380	6986	5366	6546	5616	2945	3517	2088	2445	2580		ACOT12	4953	3080	4547	3827	3047	2218	2682	601	2095	2694
		1.55269	1.97289	1.34352	1.60363	1.03731	0.71917	0.747662	0.490832	0.528877	0.631888			3.06877	1.71779	2.95068	2.11787	1.28728	0.811562	0.973503	0.250417	1.16583	1.0644
		1.13087	1.43692	0.978525	1.16797	0.755507	0.523794	0.544546	0.357489	0.385198	0.460225			1.37712	0.770863	1.32413	0.950402	0.577672	0.364191	0.436862	0.112375	0.52317	0.477653
		1.09396					0.45425							1.00004					0.38285
		0.251166					0.0823959							0.346627					0.162095
		0.000637274												0.0069161
	HMGCS2-8	7044	5473	7032	6753	6980	5298	4593	4895	4592	4861		HMGCS2-12	6592	5689	6178	6182	7791	4723	4521	4669	5752	4544
		1.71429	1.54561	1.76064	1.65434	1.28925	1.29377	0.976403	1.15068	0.993294	1.19055			4.08426	3.17289	4.00909	3.42114	3.29151	1.72814	1.64102	1.94542	3.20089	1.79534
		1.07627	0.970372	1.10537	1.03863	0.809424	0.812263	0.61301	0.722427	0.623615	0.747455			1.13587	0.882414	1.11497	0.951453	0.915401	0.480612	0.456383	0.54104	0.8902	0.499301
		1.00002					0.703754							1.00002					0.573507
		0.11791					0.0846896							0.117281					0.179724
		0.00184201												0.00215631
	actin-8	4109	3541	3994	4082	5414	4095	4704	4254	4623	4083		actin-12	1614	1793	1541	1807	2367	2733	2755	2400	1797	2531
