# Supplementary material for: Hepatic conversion of acetyl-CoA to acetate plays crucial roles in energy stress
Source: eLife journal article supplement (doi:10.7554/elife.87419), 2023-06-20
Supplement: fig7-data1 [file 20211108cal.xlsx]

## Sheet: Sheet2
	HMGCS2	802	662	539
		1	0.825436	0.67207
	HMGCS2-acetyl	1111	1481	1260
		1	1.33303	1.13411
		1.38529	2.23716	2.33766
		1.00021	1.61528	1.68784
