# Supplementary material for: Hepatic conversion of acetyl-CoA to acetate plays crucial roles in energy stress
Source: eLife. 2023 Oct 30;12:RP87419. doi: 10.7554/eLife.87419 (PMC10615369; doi:10.7554/eLife.87419)
Supplement: Figure 1—source data 1. [file elife-87419-fig1-data1.xlsx]

## Sheet: Sheet1
	Figure 1—source data 1. Patient information of clinical data.
	Volunteers #	1	2	3	4	5	6	7	8
	Gender	male	male	male	female	female	female	male	female
	Age	32	26	50	27	23	18	55	23
	Health status	healthy	healthy	healthy	healthy	healthy	healthy	healthy	healthy
	Patient #	1	2	3	4	5	6	7	8
	Gender	female	male	male	female	female	male	male	male
	Age	69	36	71	66	50	26	59	63
	Health status	Diabetes	Diabetes	Diabetes	Diabetes	Diabetes	Diabetes	Diabetes	Diabetes
	Patient #	9	10	11	12	13	14	15	16
	Gender	female	male	male	male	male	male	male	female
	Age	75	46	69	77	30	61	57	29
	Health status	Diabetes	Diabetes	Diabetes	Diabetes	Diabetes	Diabetes	Diabetes	Diabetes
	Patient #	17
	Gender	female
	Age	61
	Health status	Diabetes
